# Supplementary material for: Mitochondrial Fusion Machinery Specifically Involved in Energy Deprivation-Induced Autophagy
Source: PubMed Central journal article supplement (PMC7154291; doi:10.3389/fcell.2020.00221), 2020-04-07
Supplement: Presentation_1.pdf [file Presentation_1.pdf]

# Supplementary Materials

## Supplementary Figures

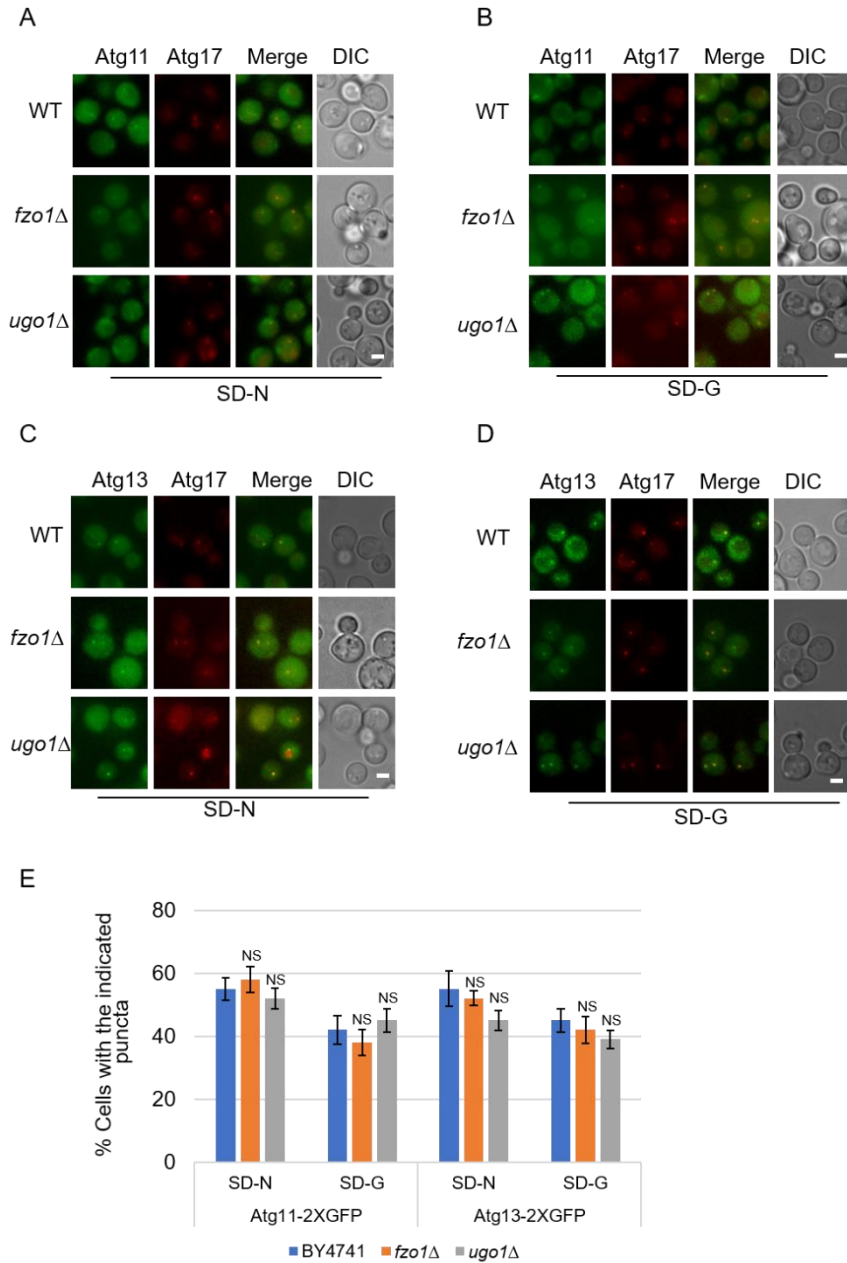

**Figure S1. The deletion of mitochondrial fusion machinery did not affect the recruitment of Atg11 and Atg13 protein to PAS under glucose starvation condition. (A-D)** Atg11-2XGFP and Atg17-2XCherry or Atg13-2XGFP and Atg17-2XCherry were co-expressed in the wild type (WT), *fzo1Δ*, and *ugo1Δ* yeast strains. Yeast cells were cultured in SD-N and SD-G for 1 h. Cells were imaged by inverted fluorescence

microscope. Scale bar, 2  $\mu\text{m}$ . **(E)** Strains from (A-D) were analyzed for the number of cells with the indicated puncta.  $n= 300$  cells pooled from 3 independent experiments. Data are presented as means  $\pm$  s.d. NS, not significant; two-tailed Student's  $t$  tests were used.

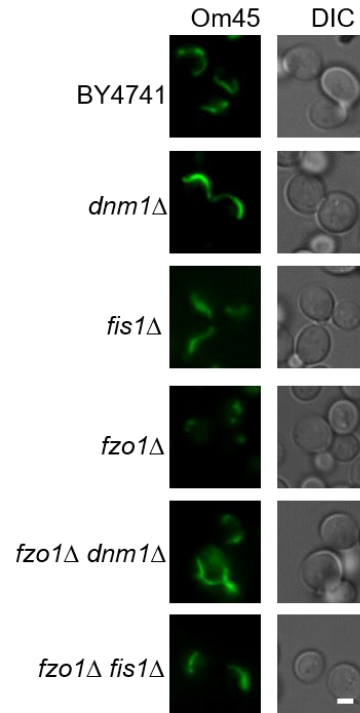

**Figure S2. Mitochondrial morphology is restored in fission and fusion double mutant cells.** Om45-GFP (mitochondria marker) was expressed in WT (BY4741), *dnm1* $\Delta$ , *fis1* $\Delta$ , *fzo1* $\Delta$ , *fzo1* $\Delta$  *dnm1* $\Delta$ , and *fzo1* $\Delta$  *fis1* $\Delta$  strains. Yeast cells were grown to the log-growth phase. Cells were imaged by inverted fluorescence microscope. Scale bar, 2  $\mu\text{m}$ .

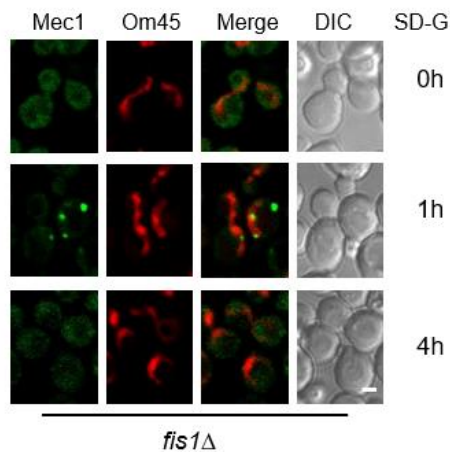

**Figure S3. Fis1 is not involved in the dissociation of Mec1 from mitochondria under prolonged glucose starvation.** GFP-Mec1 and Om45-Cherry were co-expressed in *fis1Δ* yeast strain. Yeast cells were grown to the log-growth phase, then subjected to SD-G for 0 h, 1 h and 4 h. Cells were viewed by confocal laser scanning microscope. Scale bar, 2  $\mu$ m.

A

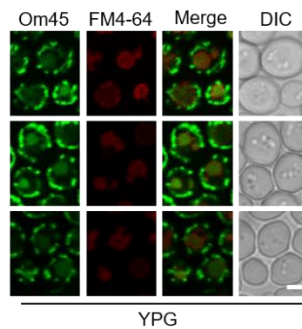

B

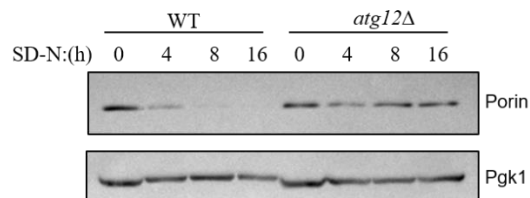

**Figure S4. Mitophagy in YPG medium and nitrogen starvation condition.** (A) Cells expressing Om45-GFP, Ato1-GFP or Atp5-GFP were grown to log-growth phase in SD-His medium, and then subjected to YPG medium for 24 h. Cells were viewed by

confocal microscope. Scale bar, 2  $\mu$ m. **(B)** Wild type cells were grown to log-growth phase in YPD medium, and then starved in SD-N medium for 0 h, 4 h, 8 h and 16 h. Porin and P<sub>gk1</sub> proteins were measured by western blot using the corresponding antibodies.

## Supplementary Tables

**Table S1.** Yeast strains in this study

| Name | Genotype                                                                 | Source        |
|------|--------------------------------------------------------------------------|---------------|
| YM1  | <i>BY4741</i>                                                            | Lab stock     |
| YM2  | <i>BY4741 fis1Δ::KanMX6 pRS316[GFP-Atg8 Ura3]</i>                        | In this study |
| YM3  | <i>BY4741 dnm1Δ::KanMX6 pRS316[GFP-Atg8 Ura3]</i>                        | In this study |
| YM4  | <i>BY4741 caf4Δ::KanMX6 pRS316[GFP-Atg8 Ura3]</i>                        | In this study |
| YM5  | <i>BY4741 mdv1Δ::KanMX6 pRS316[GFP-Atg8 Ura3]</i>                        | In this study |
| YM6  | <i>BY4741 mgm1Δ::KanMX6 pRS316[GFP-Atg8 Ura3]</i>                        | In this study |
| YM7  | <i>BY4741 pcp1Δ::KanMX6 pRS316[GFP-Atg8 Ura3]</i>                        | In this study |
| YM8  | <i>BY4741 ugo1Δ::KanMX6 pRS316[GFP-Atg8 Ura3]</i>                        | In this study |
| YM9  | <i>BY4741 fzo1Δ::KanMX6 pRS316[GFP-Atg8 Ura3]</i>                        | In this study |
| YM10 | <i>BY4741 mdm20Δ::KanMX6 pRS316[GFP-Atg8 Ura3]</i>                       | In this study |
| YM11 | <i>BY4741 mdm31Δ::KanMX6 pRS316[GFP-Atg8 Ura3]</i>                       | In this study |
| YM12 | <i>BY4741 mdm32Δ::KanMX6 pRS316[GFP-Atg8 Ura3]</i>                       | In this study |
| YM13 | <i>BY4741 mdm33Δ::KanMX6 pRS316[GFP-Atg8 Ura3]</i>                       | In this study |
| YM14 | <i>BY4741 gem1Δ::KanMX6 pRS316[GFP-Atg8 Ura3]</i>                        | In this study |
| YM15 | <i>BY4741 Atg17-2XCherry::hphNT1 Atg2-2XGFP::Ura3</i>                    | in this study |
| YM16 | <i>BY4741 fzo1Δ::KanMX6 Atg17-2XCherry::hphNT1 Atg2-2XGFP::Ura3</i>      | in this study |
| YM17 | <i>BY4741 ugo1Δ::KanMX6 Atg17-2XCherry::hphNT1 Atg2-2XGFP::Ura3</i>      | in this study |
| YM18 | <i>BY4741 Atg17-2XCherry::hphNT1 Atg5-2XGFP::Ura3</i>                    | in this study |
| YM19 | <i>BY4741 fzo1Δ::KanMX6 Atg17-2XCherry::hphNT1 Atg5-2XGFP::Ura3</i>      | in this study |
| YM20 | <i>BY4741 ugo1Δ::KanMX6 Atg17-2XCherry::hphNT1 Atg5-2XGFP::Ura3</i>      | in this study |
| YM21 | <i>BY4741 Atg17-2XCherry::hphNT1 Atg11-2XGFP::Ura3</i>                   | in this study |
| YM22 | <i>BY4741 fzo1Δ::KanMX6 Atg17-2XCherry::hphNT1 Atg11-2XGFP::Ura3</i>     | in this study |
| YM23 | <i>BY4741 ugo1Δ::KanMX6 Atg17-2XCherry::hphNT1 Atg11-2XGFP::Ura3</i>     | in this study |
| YM24 | <i>BY4741 Atg17-2XCherry::hphNT1 pRS316[GFP-Atg1 Ura3]</i>               | in this study |
| YM25 | <i>BY4741 fzo1Δ::KanMX6 Atg17-2XCherry::hphNT1 pRS316[GFP-Atg1 Ura3]</i> | in this study |
| YM26 | <i>BY4741 ugo1Δ::KanMX6 Atg17-2XCherry::hphNT1 pRS316[GFP-Atg1 Ura3]</i> | in this study |
| YM27 | <i>BY4741 3XFLAG-Mec1::natNT2 pRS316[HA-Snf1 Ura3]</i>                   | in this study |
| YM28 | <i>BY4741 fzo1Δ::KanMX6 3XFLAG-Mec1::natNT2 pRS316[HA-Snf1 Ura3]</i>     | in this study |

|      |                                                                                          |               |
|------|------------------------------------------------------------------------------------------|---------------|
| YM29 | <i>BY4741 mgm1Δ::KanMX6 3XFLAG-Mec1::natNT2 pRS316[HA-Snf1 Ura3]</i>                     | in this study |
| YM30 | <i>BY4741 ugo1Δ::KanMX6 3XFLAG-Mec1::natNT2 pRS316[HA-Snf1 Ura3]</i>                     | in this study |
| YM31 | <i>BY4741 GFP-Mec1::natNT2 Om45-Cherry::KanMX6</i>                                       | Lab stock     |
| YM32 | <i>BY4741 fzo1Δ::KanMX6 GFP-Mec1::natNT2 Om45-Cherry::KanMX6</i>                         | In this study |
| YM33 | <i>BY4741 ugo1Δ::KanMX6 GFP-Mec1::natNT2 Om45-Cherry::KanMX6</i>                         | In this study |
| YM34 | <i>BY4741 fis1Δ::KanMX6 GFP-Mec1::natNT2 Om45-Cherry::KanMX6</i>                         | In this study |
| YM35 | <i>BY4741 snf1Δ::KanMX6 GFP-Mec1::natNT2 Om45-Cherry::KanMX6 pRS316</i>                  | In this study |
| YM36 | <i>BY4741 snf1Δ::KanMX6 GFP-Mec1::natNT2 Om45-Cherry::KanMX6 pRS316[HA-Snf1 Ura3]</i>    | In this study |
| YM37 | <i>BY4741 snf1Δ::KanMX6 GFP-Mec1::natNT2 Om45-Cherry::KanMX6 pRS316[HA-Snf1 KD Ura3]</i> | In this study |
| YM38 | <i>BY4741 pho8::pho8Δ60 pho13Δ:: hphNT1</i>                                              | Lab stock     |
| YM39 | <i>BY4741 pho8::pho8Δ60 pho13Δ:: hphNT1 atg5Δ::KanMX6</i>                                | Lab stock     |
| YM40 | <i>BY4741 pho8::pho8Δ60 pho13Δ:: hphNT1 atg17Δ::KanMX6</i>                               | Lab stock     |
| YM41 | <i>BY4741 pep4Δ::KanMX6</i>                                                              | Lab stock     |
| YM42 | <i>BY4741 Om45-GFP::HisMX6</i>                                                           | Lab stock     |
| YM43 | <i>BY4741 Alo1-GFP::HisMX6</i>                                                           | Lab stock     |
| YM44 | <i>BY4741 Atp5-GFP::HisMX6</i>                                                           | Lab stock     |
| YM45 | <i>BY4741 atg1Δ::KanMX6 pRS316[GFP-Atg8 Ura3]</i>                                        | Lab stock     |
| YM46 | <i>BY4741 atg3Δ::KanMX6 pRS316[GFP-Atg8 Ura3]</i>                                        | Lab stock     |
| YM47 | <i>BY4741 atg12Δ::KanMX6 pRS316[GFP-Atg8 Ura3]</i>                                       | Lab stock     |
| YM48 | <i>BY4741 atg32Δ::KanMX6 pRS316[GFP-Atg8 Ura3]</i>                                       | Lab stock     |
| YM49 | <i>BY4741 IDH1-GFP::HisMX6</i>                                                           | Lab stock     |
| YM50 | <i>BY4741 IDH2-GFP::HisMX6</i>                                                           | Lab stock     |
| YM51 | <i>BY4741 Om45-GFP::HisMX6 dnm1Δ::KanMX6</i>                                             | In this study |
| YM52 | <i>BY4741 Om45-GFP::HisMX6 fis1Δ::KanMX6</i>                                             | In this study |
| YM53 | <i>BY4741 Om45-GFP::HisMX6 fzo1Δ::KanMX6</i>                                             | In this study |
| YM54 | <i>BY4741 Om45-GFP::HisMX6 fzo1Δ::KanMX6 dnm1Δ:: hphNT1</i>                              | In this study |
| YM55 | <i>BY4741 Om45-GFP::HisMX6 fzo1Δ::KanMX6 fis1Δ:: hphNT1</i>                              | In this study |
| YM56 | <i>BY4741 fzo1Δ::KanMX6 fis1Δ:: hphNT1 pRS316[GFP-Atg8 Ura3]</i>                         | In this study |
| YM57 | <i>BY4741 fzo1Δ::KanMX6 dnm1Δ:: hphNT1 pRS316[GFP-Atg8 Ura3]</i>                         | In this study |
